# Supplementary material for: Ozone Monitoring Instrument (OMI) UV aerosol index data analysis over the Arctic region for future data assimilation and climate forcing applications
Source: Copernicus journal article supplement (doi:10.5194/acp-23-7161-2023), 2023-06-28
Supplement: Supplementary file 1 [file acp-23-7161-2023-supplement.zip]

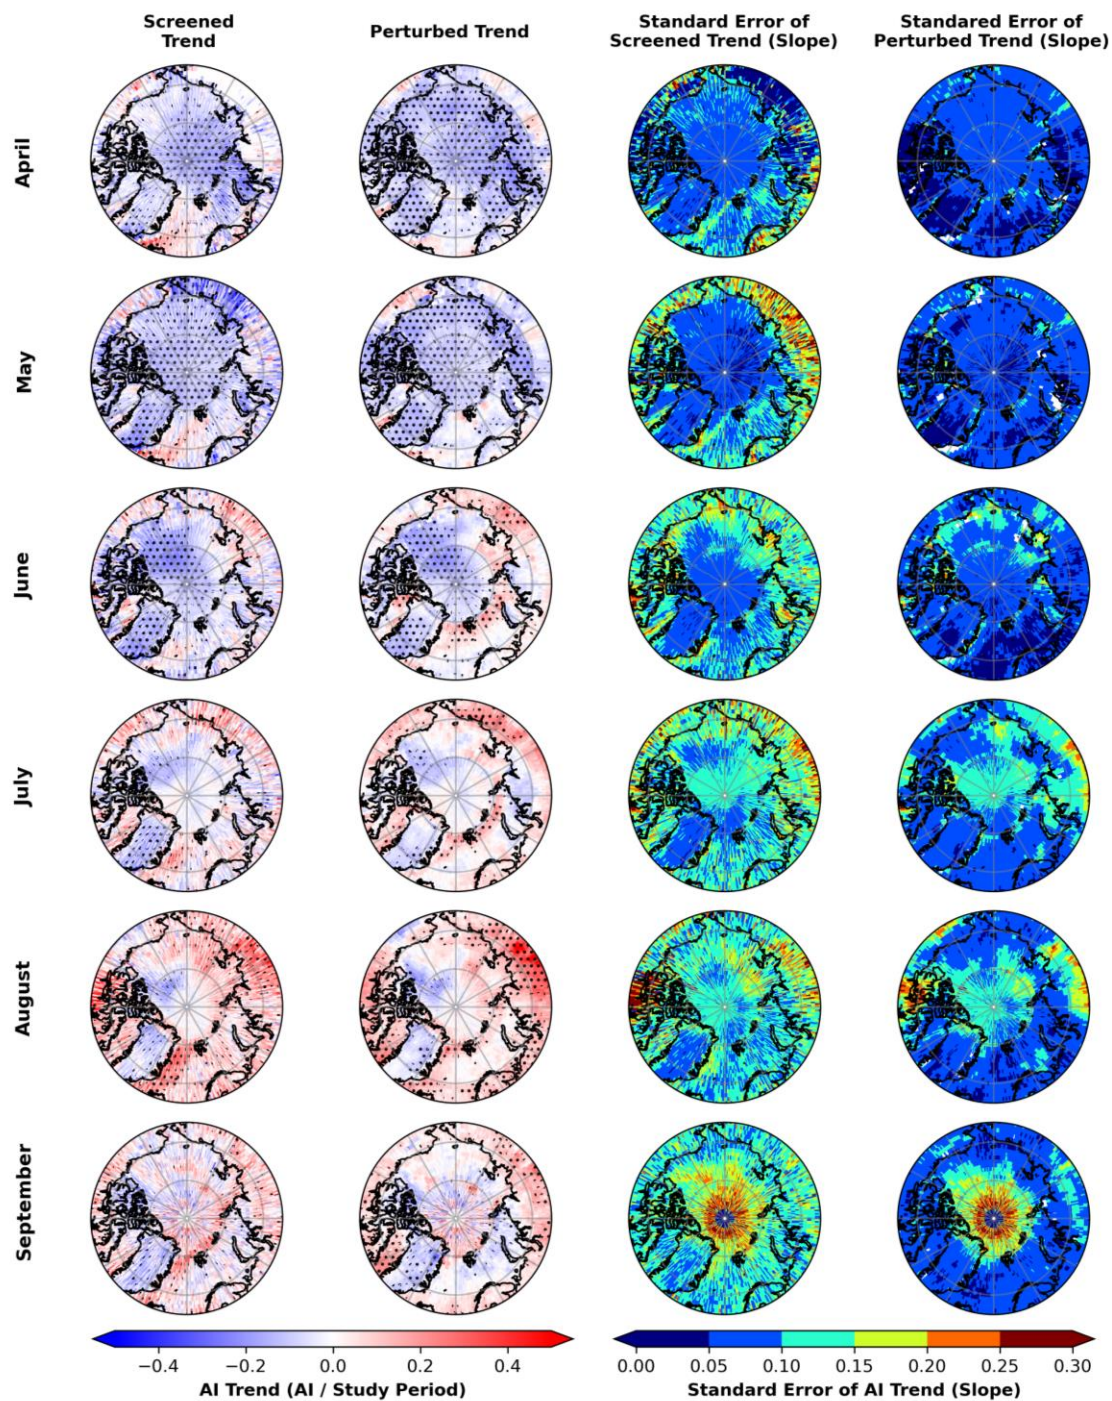

Figure S1: April (first and top row), May (second row), June (third row), July (fourth row), August (fifth row), and September (sixth and bottom row) monthly trend of screened OMI AI data (first column) and perturbed AI data (second column), as well as the standard error of the screened (third column) and perturbed (fourth column) AI trends. Trends are calculated between 2005 and 2020. The dotted regions in the left two columns denote trends that are statistically significant at the 95% confidence level.
