# Supplementary material for: Ozone Monitoring Instrument (OMI) UV aerosol index data analysis over the Arctic region for future data assimilation and climate forcing applications
Source: Copernicus journal article supplement (doi:10.5194/acp-23-7161-2023), 2023-06-28
Supplement: Supplementary file 2 [file acp-23-7161-2023-supplement.zip]

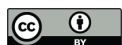

## *Supplement of*

# **Ozone Monitoring Instrument (OMI) UV aerosol index data analysis over the Arctic region for future data assimilation and climate forcing applications**

**Blake T. Sorenson et al.**

*Correspondence to:* Blake T. Sorenson (blake.sorenson@und.edu)

- acp-23-7161-2023-supplement-title-page.pdf
- sorenson\_et\_al\_supplemental\_materials
  - FigS1\_caption.pdf
  - sorenson\_et\_al\_data
    - \* README
    - \* omi\_ai\_perturbed\_2005\_2020.nc
    - \* omi\_ai\_screened\_2005\_2020.nc

The copyright of individual parts of the supplement might differ from the article licence.
